# Supplementary material
Source: HighWire-hosted journal article supplement (https://bmjopenquality.bmj.com/highwire/filestream/147305/field_highwire_adjunct_files/1/bmjoq-2023-002467supp002_data_supplement.pdf)
Supplement: bmjoq-2023-002467supp002_data_supplement.pdf [file bmjoq-2023-002467supp002_data_supplement.pdf]

# PDSA 1

## Trainee Review Clinic Protocol: Development Phase

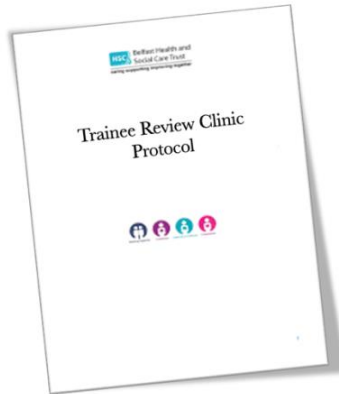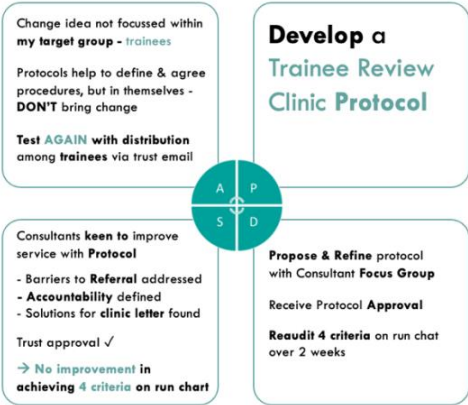

# PDSA 2

## Trainee Review Clinic Protocol: Distribution Phase

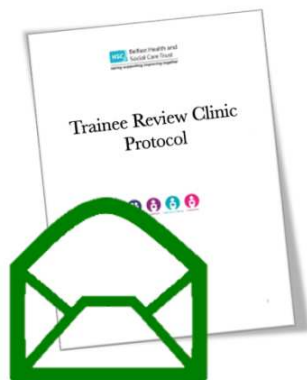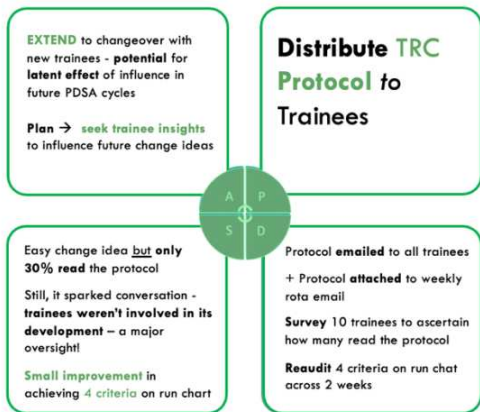

# PDSA 3

## Trainee Review Clinic : Troubleshooting Session

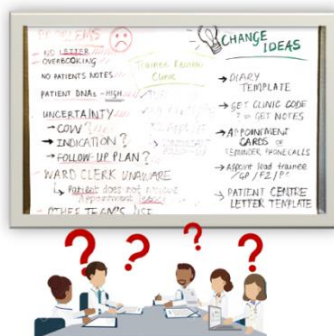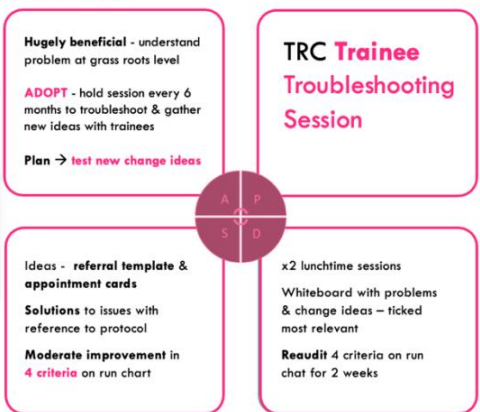

# PDSA 4

## Trainee Review Clinic Protocol: Referral Proforma

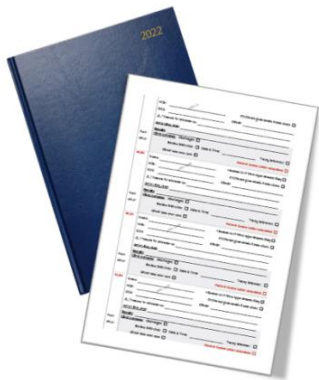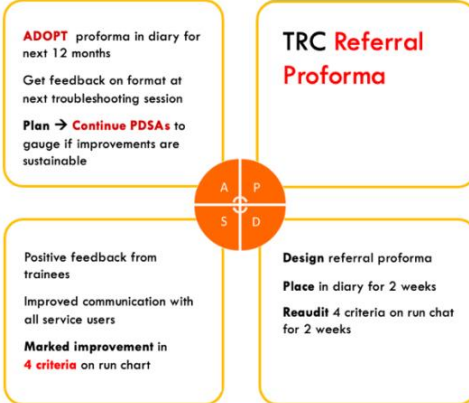

# PDSA 5

## Trainee Review Clinic Protocol: Appointment Cards

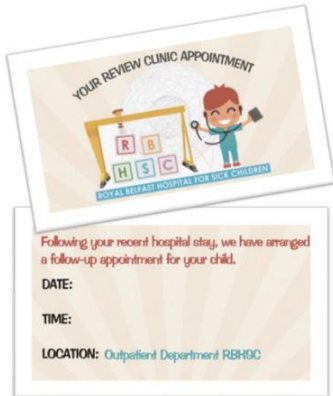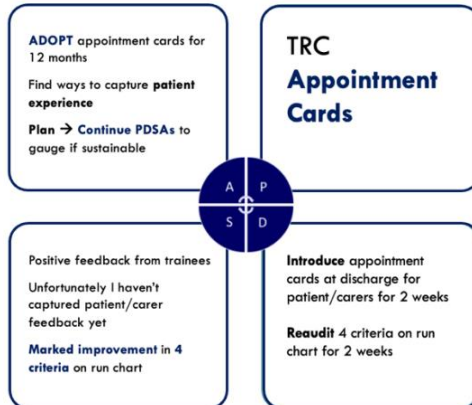

Supplement 2. PDSA of 6 test cycles in series
